# Supplementary material
Source: publisher site journal article supplement (https://www.dovepress.com/get_supplementary_file.php?f=364156.docx)
Supplement: Supplementary file 1 [file get_supplementary_file.php]

**Supplementary Table 1. Ptient's complete blood count test results.**

| **Cpleted blood count** | **Rsults** | **Uit** | **Reference range** |
| --- | --- | --- | --- |
| Total WBC count | 5.62 | 109/L | 3.5-9.5 |
| Total RBC count | 4.19 | 1012/L | 3.8-5.1 |
| Haemoglobin | 128 | g/L | 115-150 |
| HCT | 40.4 | % | 35-45 |
| MCV | 96.4 | Fl | 82-100 |
| MCH | 30.50 | pg | 27-34 |
| MCHC | 317 | g/L | 316-354 |
| Total platelets count | 179 | 109/L | 125-350 |
| Neutrophils | 72.6 | % | 40-75 |
| Lymphocyte% | 16.70 | % | 20-50 |
| Monocytes% | 9.10 | % | 3-10 |
| Eosinophils% | 1.10 | % | 0.4-8 |
| Basophils% | 0.50 | % | 0-1 |
| NEUT | 4.08 | 109/L | 1.8-6.3 |
| LYMPH | 0.94 | 109/L | 1.1-3.2 |
| MONO | 0.51 | 109/L | 0.1-0.6 |
| EO | 0.06 | 109/L | 0.02-0.52 |
| BASO | 0.03 | 109/L | 0-0.06 |
| RDW-CV | 13.1 | % | 10.9-15.4 |
| PCT | 0.20 | % | 0.1-0.5 |
| MPV | 11.20 | fL | 7.6-13.2 |
| P-LCR | 34.3 | % | 13-43 |

RBC: red blood cell; WBC: white blood cell; MCHC: mean corpuscular

hemoglobin concentration; MCH: mean corpuscular hemoglobin;

MCV: mean corpuscular volume; RDW-CV: red blood cell distribution

width coefficient of variation; MPV: mean platelet volume; PDW-CV:

platelet distribution width coefficient of variation; PCT: platelet crit; P-LCR:

platelet-large cell rate; HCT: red blood cell specific volume; NEUT: Absolute

neutrophil count; LYMPH: Absolute lymphocyte count; MONO: Absolute

monocytes count; EO: Absolute eosinophils count; BASO: Absolute Basophils

count.

**Supplementary Table 2. Patient's liver functio test results.**

| **Lver functio** | **Results** | **Unit** | **Reference range** |
| --- | --- | --- | --- |
| ALT | 25.90 | U/L | 9-50 |
| AST | 26.3 | U/L | 15-40 |
| GGT | 29.0 | U/L | 10-60 |
| Total protein | 68.5 | g /L | 65-85 |
| Albumin | 43.3 | g /L | 40-55 |
| Total bilirubin | 7.60 | umol /L | 0-26 |
| Direct bilirubin | 3.0 | umol /L | 0-8 |

ALT: Alanine transaminase; AST: Aspartate aminotransferase;

GGT: Gamma utamyltransferase.

**Supplementary Table 3. Patient's renal function test results.**

| **Rnal function** | **Rults** | **Unit** | **Rerence range** |
| --- | --- | --- | --- |
| Urea | 4.87 | mmol /L | 3.6-9.5 |
| Creatinine | 75.2 | umol /L | 57-111 |
| Uric acid | 355 | umol /L | 120-420 |
| C02 | 27 | mmol /L | 20-30 |
| β2-MG | 1.87 | mg /L | 0-3 |
| Cystatin C | 0.94 | mg /L | 0.48-1.35 |
| eGFR | 94.28 | ml /min /1.73m2 | - |

β2-MG: β2-microglobulin; eGFR: epidermal growth factor receptor.
